# Supplementary material for: Geochemical changes across a marginal marine Permo-Triassic boundary section on the Adria carbonate platform at Brsnina, Slovenia
Source: Springer Nature journal article supplement (doi:10.1007/s00531-021-01999-w), 2021-03-01
Supplement: 531_2021_1999_MOESM3_ESM.pdf [file 531_2021_1999_MOESM3_ESM.pdf]

**Supplementary Table T5. Mineral hardness & cleavage (data from Okrusch and Matthes, 2009).**

| <b>Mineral</b>     | <b>Composition</b>                               | <b>Hardness</b> | <b>Cleavage</b>    |
|--------------------|--------------------------------------------------|-----------------|--------------------|
| <b>Xenotime</b>    | <b>YPO<sub>4</sub></b>                           | <b>4.5</b>      | <b>2 perfect</b>   |
| <b>Monazite</b>    | <b>(REE, Th)PO<sub>4</sub></b>                   | <b>5 -5.5</b>   | <b>2 good/poor</b> |
| <b>Sphene</b>      | <b>CaTiSiO<sub>5</sub></b>                       | <b>5 -5.5</b>   | <b>2 poor</b>      |
| <b>Ilmenite</b>    | <b>FeTiO<sub>3</sub></b>                         | <b>5-6</b>      | <b>none</b>        |
| <b>Magnetite</b>   | <b>Fe<sub>2</sub>O<sub>4</sub></b>               | <b>5.5-6.5</b>  | <b>none</b>        |
| <b>Columbite</b>   | <b>Fe<sub>2</sub>Nb<sub>2</sub>O<sub>6</sub></b> | <b>6</b>        | <b>1</b>           |
| <b>Rutile</b>      | <b>TiO<sub>2</sub></b>                           | <b>6-6.5</b>    | <b>1</b>           |
| <b>Cassiterite</b> | <b>SnO<sub>2</sub></b>                           | <b>6-7</b>      | <b>2 good</b>      |
| <b>Quartz</b>      | <b>SiO<sub>2</sub></b>                           | <b>7</b>        | <b>none</b>        |
| <b>Zircon</b>      | <b>ZrSiO<sub>4</sub></b>                         | <b>7.5</b>      | <b>none</b>        |
