# Supplementary figures and images for: Geochemical changes across a marginal marine Permo-Triassic boundary section on the Adria carbonate platform at Brsnina, Slovenia
Source: Springer Nature journal article supplement (doi:10.1007/s00531-021-01999-w), 2021-03-01

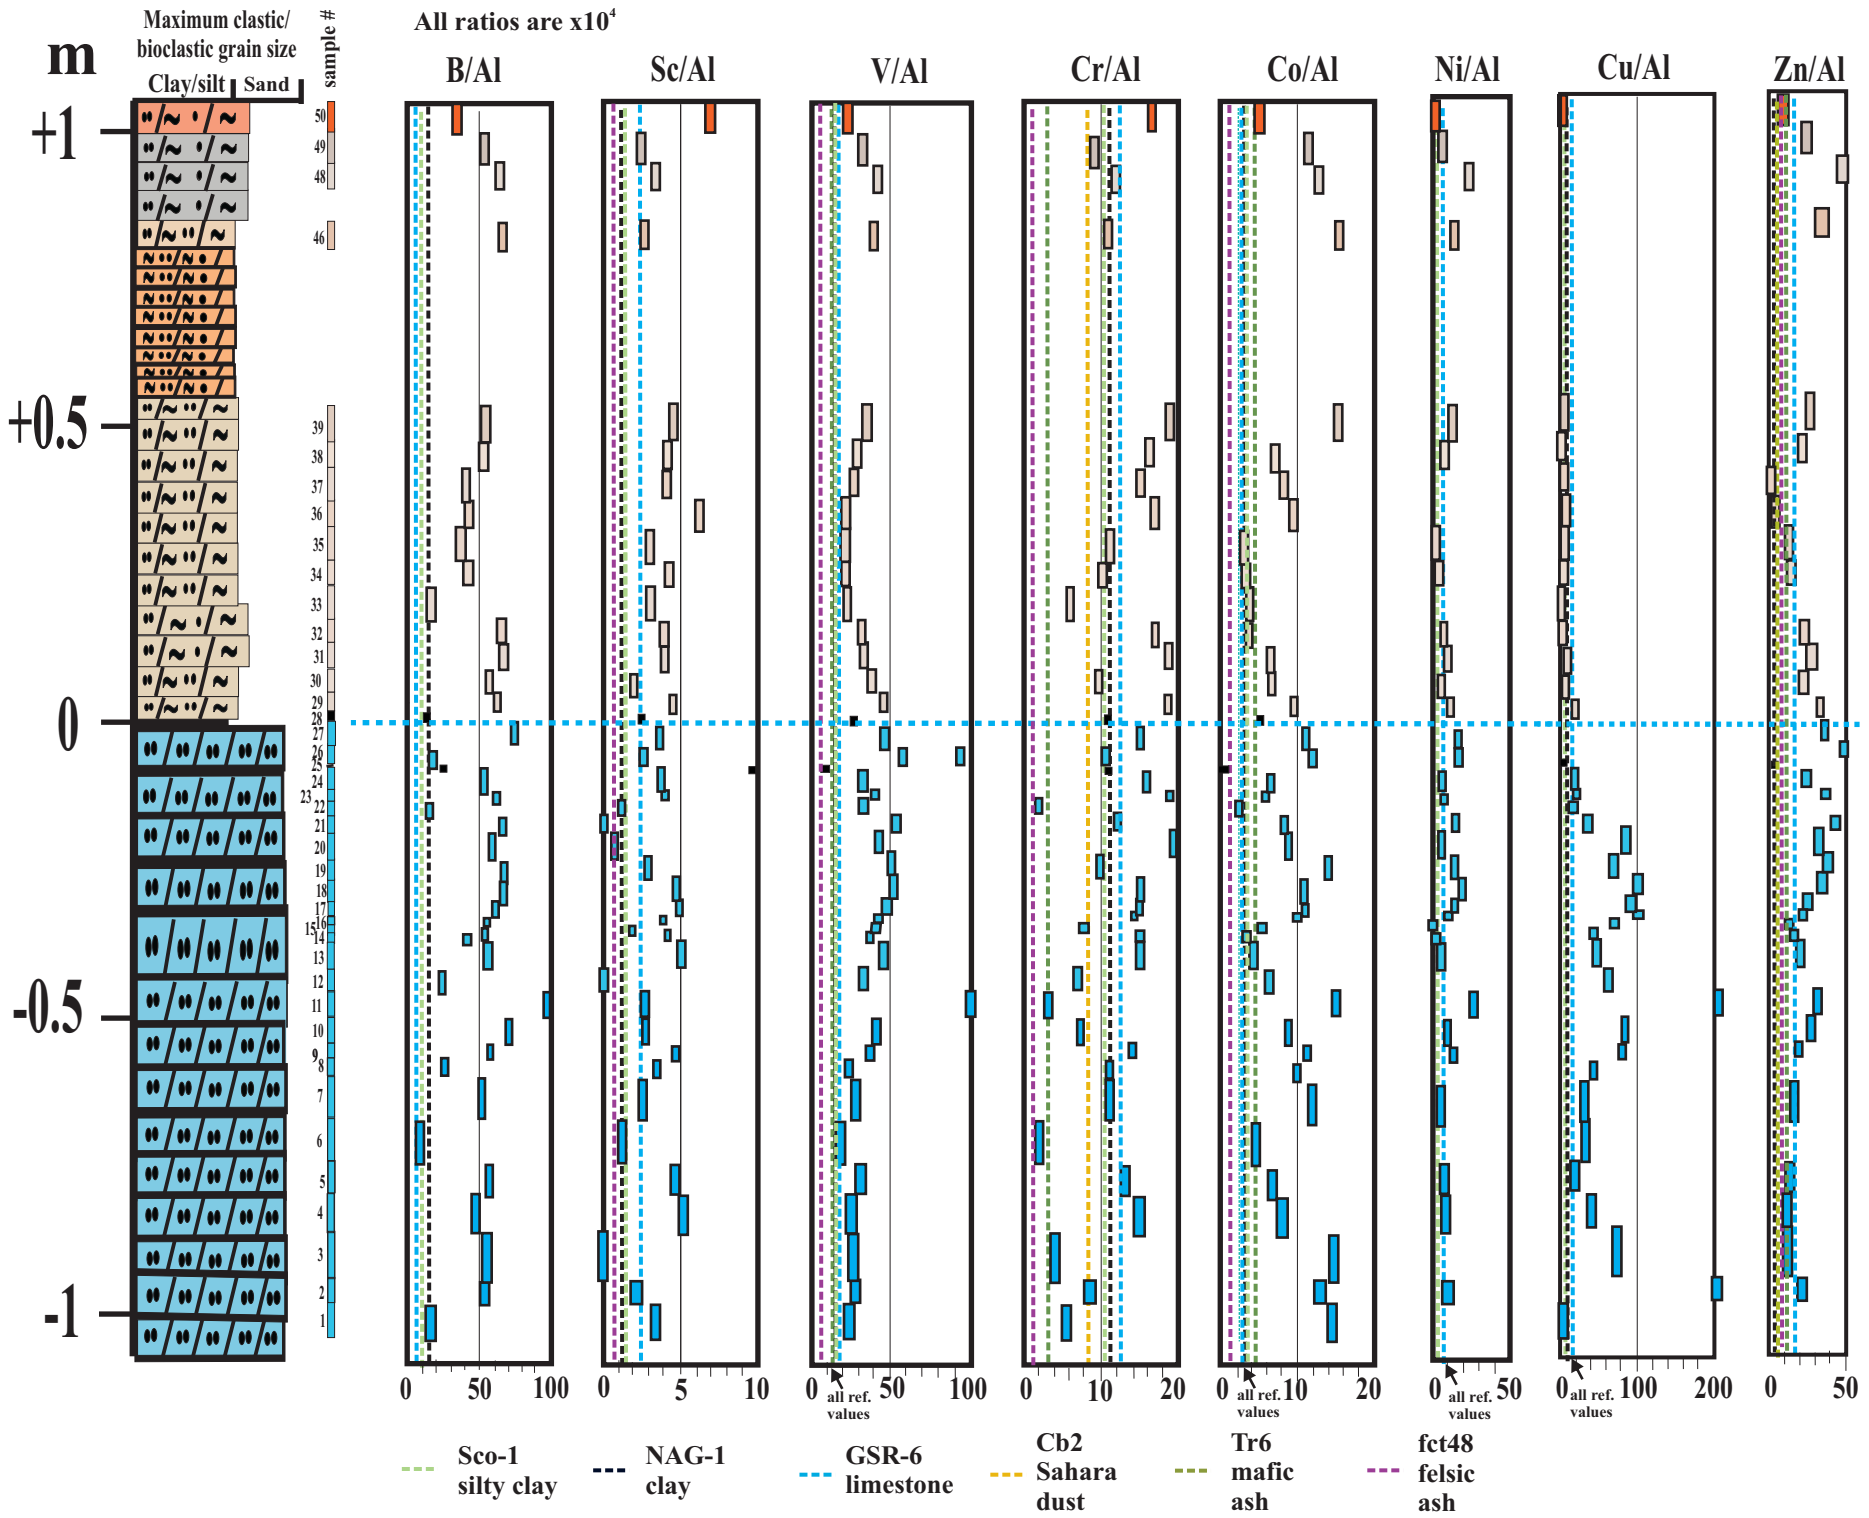



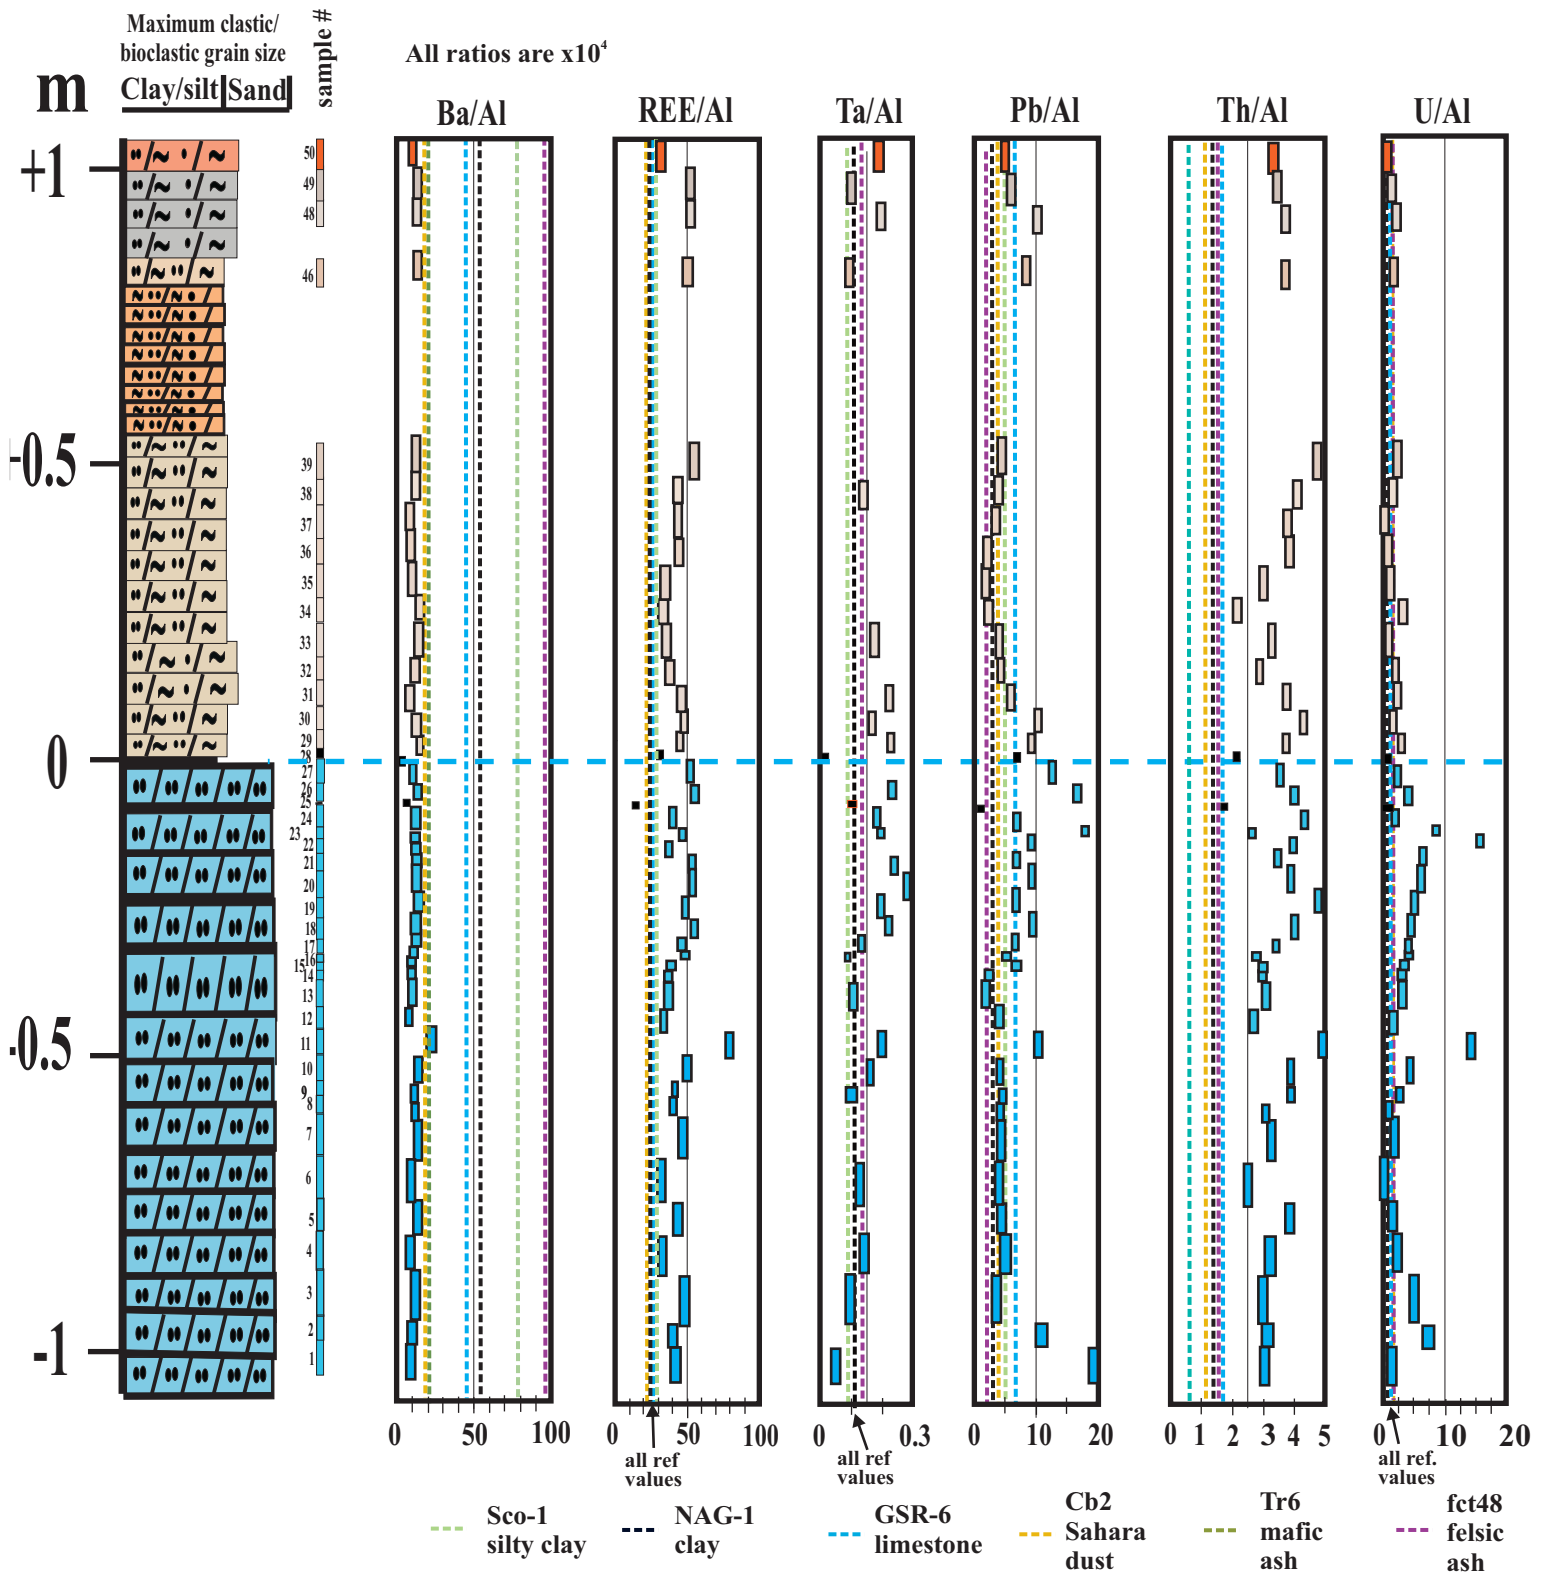

Suppl. Fig. S3

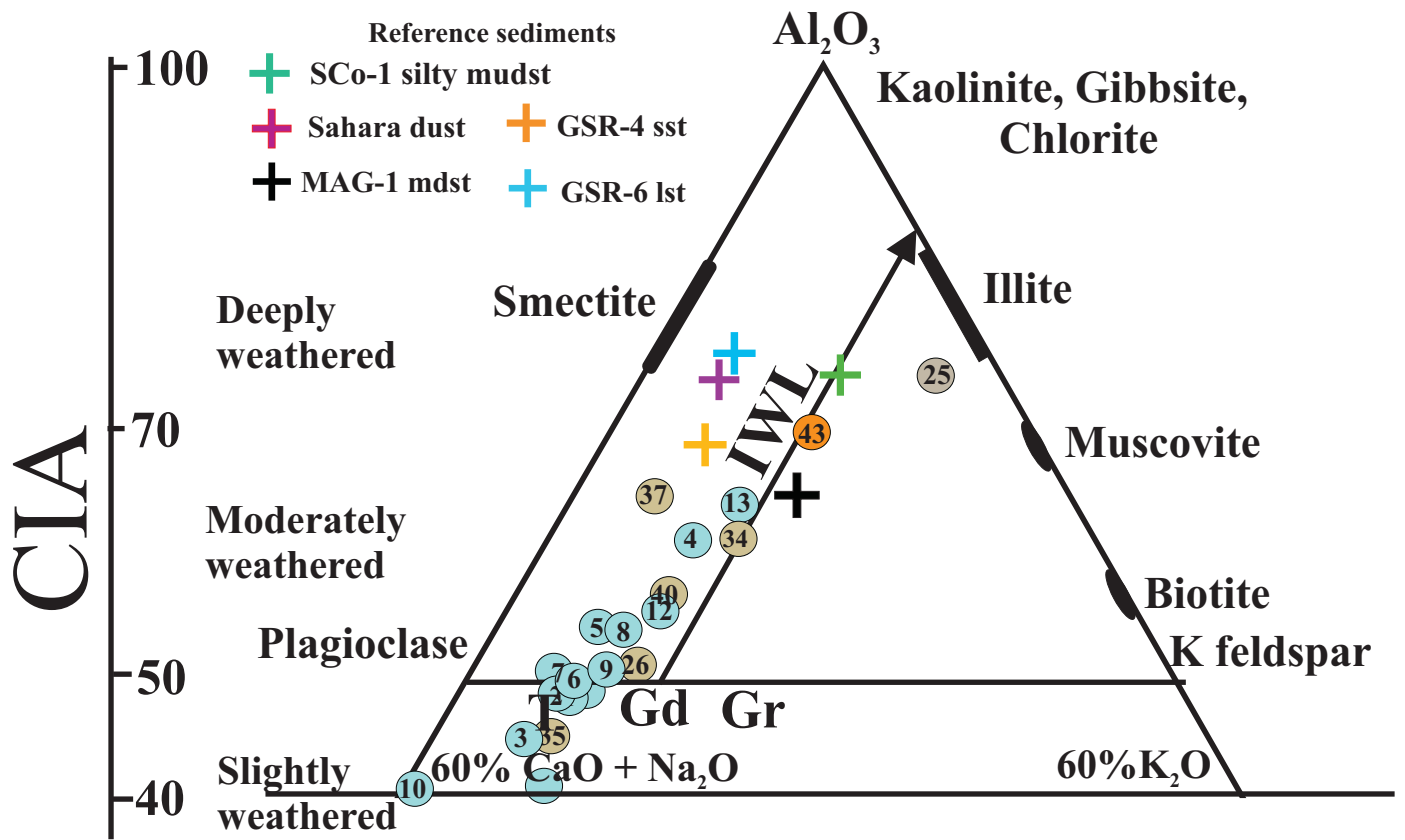

IWL - ideal feldspar weathering line

Fig S4

Supplement: 531_2021_1999_MOESM1_ESM.pdf [file 531_2021_1999_MOESM1_ESM.pdf]
